# Supplementary figures and images for: The Association of E-cigarette Flavors With Satisfaction, Enjoyment, and Trying to Quit or Stay Abstinent From Smoking Among Regular Adult Vapers From Canada and the United States: Findings From the 2018 ITC Four Country Smoking and Vaping Survey
Source: PubMed Central journal article supplement — Nicotine Tob Res. 2020 May 25;22(10):1831–41. doi: 10.1093/ntr/ntaa095 (PMC7542635; doi:10.1093/ntr/ntaa095), 2020-05-25

Supplemental Figure 1. Study Flow Diagram

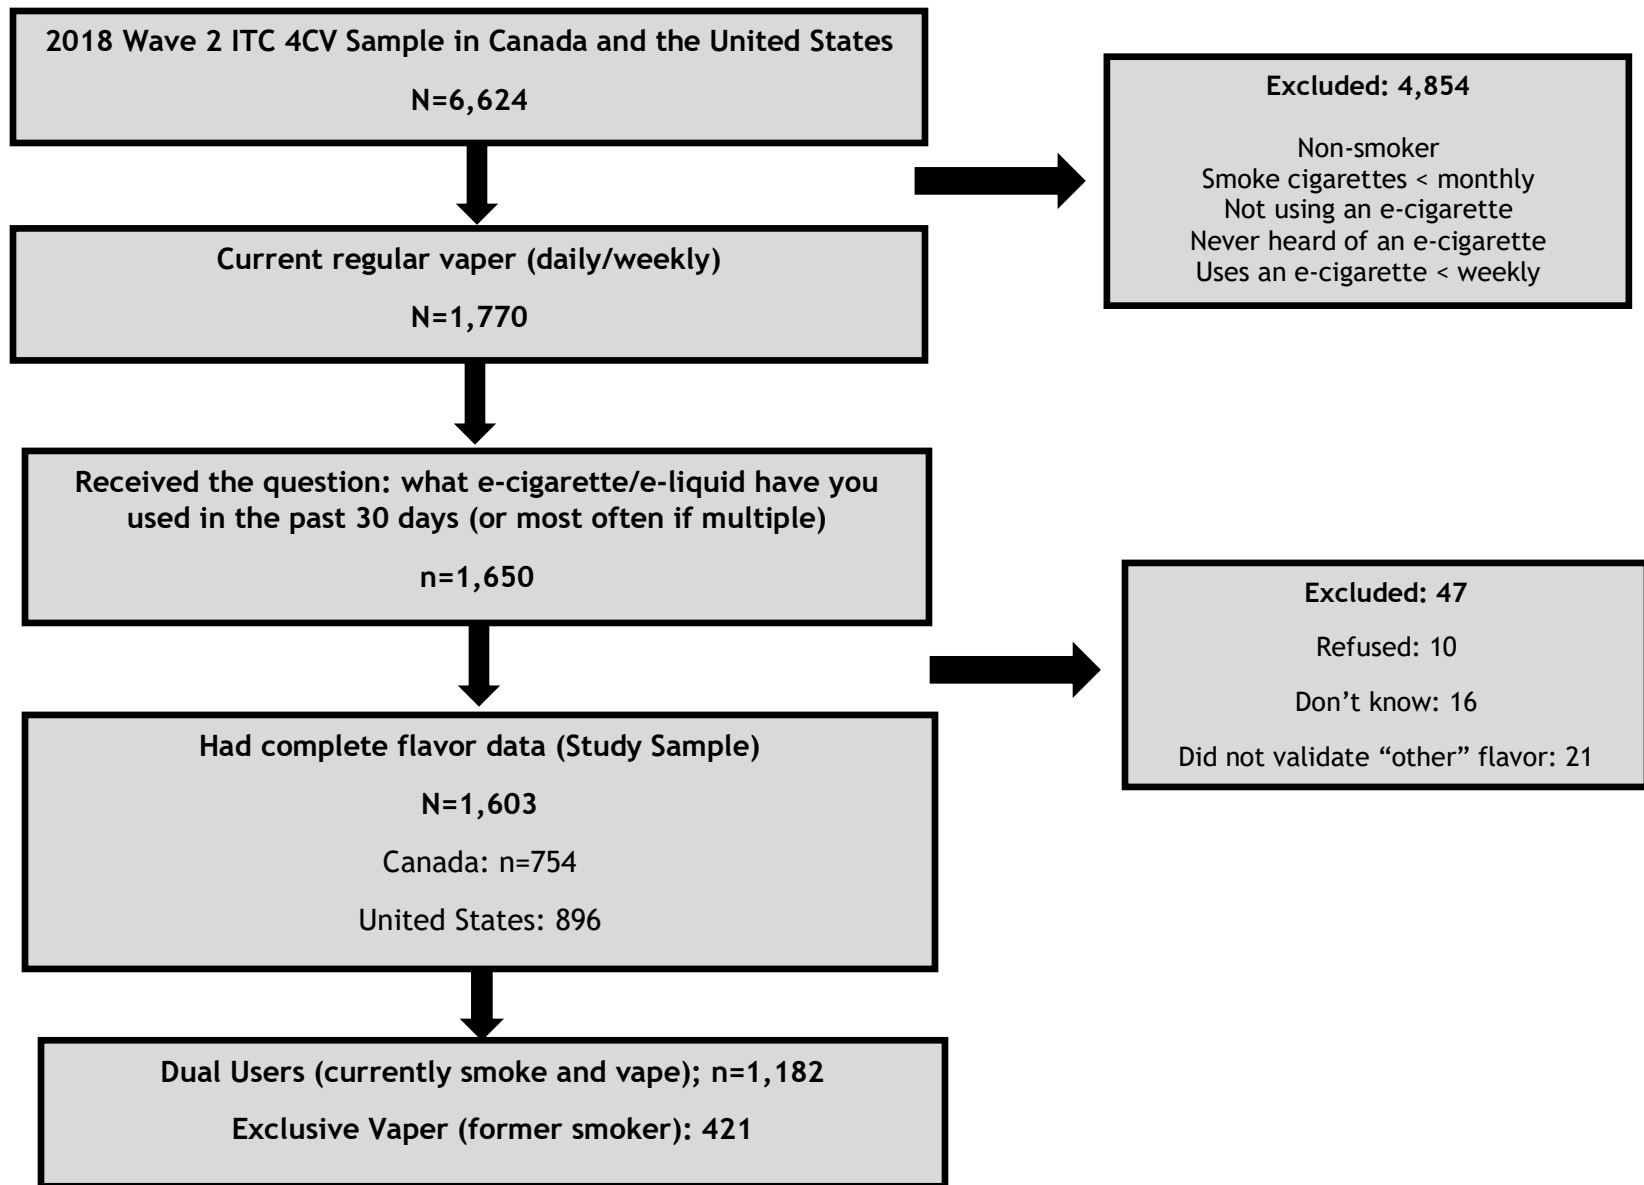

Supplement: ntaa095_suppl_supplemental_figure_1.pdf [file ntaa095_suppl_supplemental_figure_1.pdf]
